# Supplementary material for: Spatial clusters of HIV-1 genotypes in a recently infected population in Yunnan, China
Source: PubMed Central journal article supplement (PMC6664787; doi:10.1186/s12879-019-4276-9), 2019-07-29
Supplement: 12879_2019_4276_MOESM1_ESM.pdf [file 12879_2019_4276_MOESM1_ESM.pdf]

**Additional file 1: Table S1. The comparison of scan statistical results by using different percentages of the population at risk.**

| Spatial Clusters              |                   | County Code                                                                                                  | Number of cases | Relative Risk | Log Likelihood Ratio | <i>p</i> -value |
|-------------------------------|-------------------|--------------------------------------------------------------------------------------------------------------|-----------------|---------------|----------------------|-----------------|
| <b>CRF01_AE</b>               |                   |                                                                                                              |                 |               |                      |                 |
| 10% of the population at risk | Primary Cluster   | 53290100                                                                                                     | 10              | 17.41         | 18.1                 | 6.4E-07         |
|                               | Secondary Cluster | 53012200, 53018100, 53040200, 53011200, 53042100, 53042200                                                   | 11              | 5.36          | 8.6                  | 7.0E-03         |
| 30% of the population at risk | Primary Cluster   | 53290100                                                                                                     | 10              | 17.41         | 18.1                 | 1.3E-06         |
|                               | Secondary Cluster | 53012200, 53018100, 53040200, 53011200, 53042100, 53042200                                                   | 11              | 5.36          | 8.6                  | 1.1E-02         |
| 50% of the population at risk | Primary Cluster   | 53290100                                                                                                     | 10              | 17.41         | 18.1                 | 2.0E-06         |
|                               | Secondary Cluster | 53012200, 53018100, 53040200, 53011200, 53042100, 53042200                                                   | 11              | 5.36          | 8.6                  | 1.3E-02         |
| <b>CRF07_BC</b>               |                   |                                                                                                              |                 |               |                      |                 |
| 10% of the population at risk | Primary Cluster   | 53010200, 53010300, 53011200, 53018100                                                                       | 16              | 3.68          | 8.3                  | 1.4E-02         |
| 30% of the population at risk | Primary Cluster   | 53010200, 53010300, 53011200, 53018100                                                                       | 16              | 3.68          | 8.3                  | 2.0E-02         |
| 50% of the population at risk | Primary Cluster   | 53010200, 53010300, 53011200, 53018100                                                                       | 16              | 3.68          | 8.3                  | 2.0E-02         |
| <b>CRF08_BC</b>               |                   |                                                                                                              |                 |               |                      |                 |
| 10% of the population at risk | Primary Cluster   | 53252200, 53252300, 53250100, 53250200, 53262100, 53253200, 53252800, 53253000, 53262200, 53252400, 53262500 | 63              | 4.78          | 41.2                 | 4.4E-16         |
| 30% of the population at risk | Secondary Cluster | 53060200, 53062100                                                                                           | 20              | 4.24          | 13.0                 | 1.5E-04         |
|                               | Primary Cluster   | 53252200, 53252300, 53250100, 53250200, 53262100, 53253200, 53252800, 53253000, 53262200, 53252400, 53262500 | 63              | 4.78          | 41.2                 | 3.6E-15         |
| 50% of the population at risk | Secondary Cluster | 53060200, 53062100                                                                                           | 20              | 4.24          | 13.0                 | 2.9E-04         |
|                               | Primary Cluster   | 53252200, 53252300, 53250100, 53250200, 53262100, 53253200, 53252800, 53253000, 53262200, 53252400, 53262500 | 63              | 4.78          | 41.2                 | 1.0E-14         |
|                               | Secondary Cluster | 53060200, 53062100                                                                                           | 20              | 4.24          | 13.0                 | 3.8E-04         |

**URFs**

|                               |                   |                                                                                          |    |      |      |         |
|-------------------------------|-------------------|------------------------------------------------------------------------------------------|----|------|------|---------|
| 10% of the population at risk | Primary Cluster   | 53312300, 53312200, 53312400, 53052200, 53310300, 53310200                               | 23 | 9.62 | 28.2 | 4.1E-11 |
|                               | Secondary Cluster | 53262100, 53262200, 53252300, 53262500, 53252200, 53262300, 53253200, 53262600, 53250200 | 16 | 3.51 | 7.7  | 2.4E-02 |
| 30% of the population at risk | Primary Cluster   | 53312300, 53312200, 53312400, 53052200, 53310300, 53310200                               | 23 | 9.62 | 28.2 | 1.4E-10 |
|                               | Secondary Cluster | 53262100, 53262200, 53252300, 53262500, 53252200, 53262300, 53253200, 53262600, 53250200 | 16 | 3.51 | 7.7  | 3.3E-02 |
| 50% of the population at risk | Primary Cluster   | 53312300, 53312200, 53312400, 53052200, 53310300, 53310200                               | 23 | 9.62 | 28.2 | 2.4E-10 |
|                               | Secondary Cluster | 53262100, 53262200, 53252300, 53262500, 53252200, 53262300, 53253200, 53262600, 53250200 | 16 | 3.51 | 7.7  | 3.6E-02 |

---
