# Supplementary material for: Spatial clusters of HIV-1 genotypes in a recently infected population in Yunnan, China
Source: PubMed Central journal article supplement (PMC6664787; doi:10.1186/s12879-019-4276-9), 2019-07-29
Supplement: 12879_2019_4276_MOESM2_ESM.pdf [file 12879_2019_4276_MOESM2_ESM.pdf]

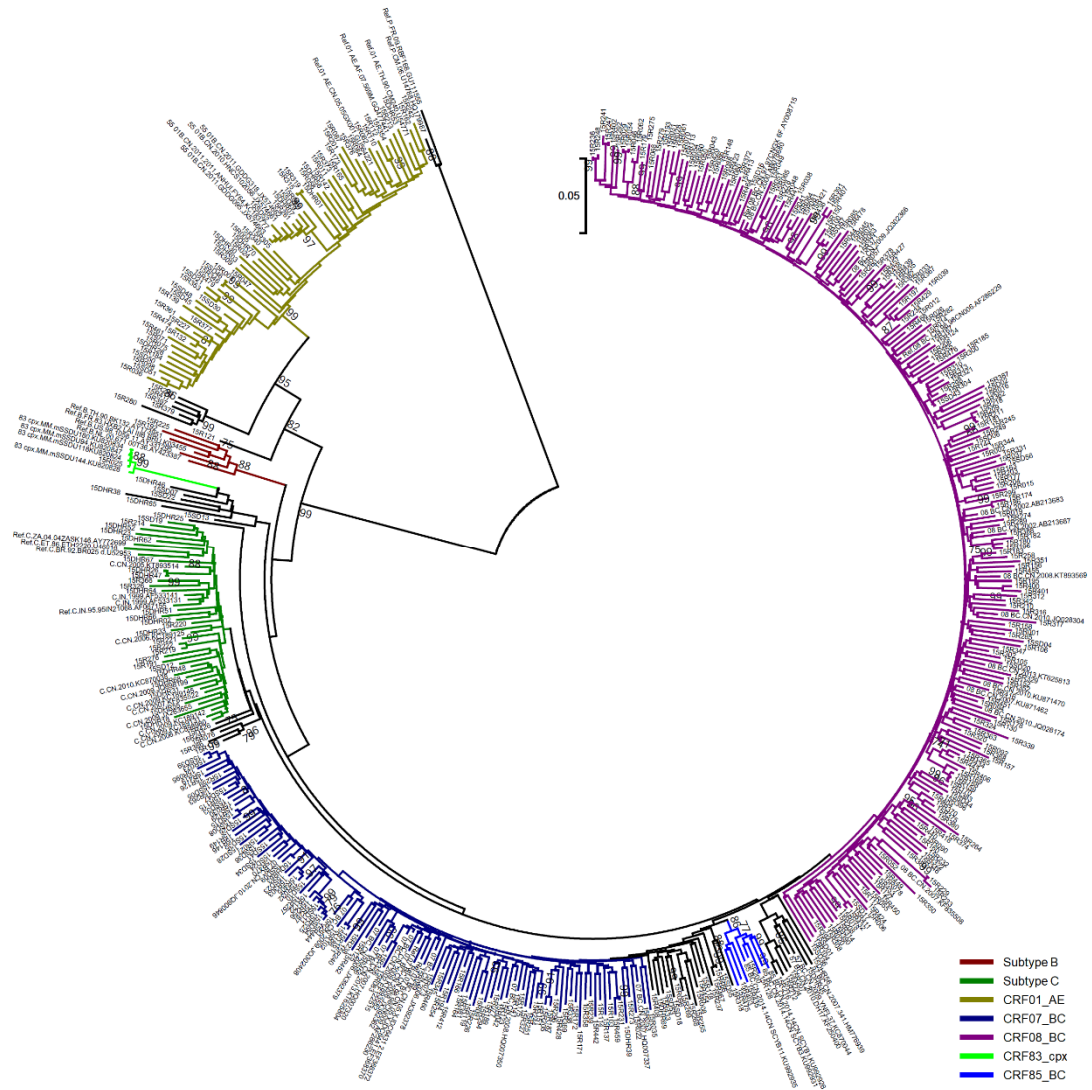

**Additional File 2: Figure S1. Neighbour-joining phylogenetic tree of the partial *gag* gene.** The scale bar indicates 5% nucleotide sequence divergence. Values on the branches represent the percentage of 1000 bootstrap replicates.
