# Supplementary material for: Spatial clusters of HIV-1 genotypes in a recently infected population in Yunnan, China
Source: PubMed Central journal article supplement (PMC6664787; doi:10.1186/s12879-019-4276-9), 2019-07-29
Supplement: 12879_2019_4276_MOESM5_ESM.pdf [file 12879_2019_4276_MOESM5_ESM.pdf]

**Additional file 5: Table S2. The constituent of subjects successfully genotyped.**

| Characteristics            | BED positive subjects | Subjects obtaining suptypes | $\chi^2$ | <i>P</i> |
|----------------------------|-----------------------|-----------------------------|----------|----------|
| <b>Total</b>               | 586                   | 439                         |          |          |
| <b>Prefecture</b>          |                       |                             | 17.889   | 0.269    |
| Baoshan                    | 27                    | 23                          |          |          |
| Chuxiong                   | 9                     | 7                           |          |          |
| Dali                       | 37                    | 31                          |          |          |
| Dehong                     | 71                    | 30                          |          |          |
| Diqing                     | 3                     | 0                           |          |          |
| Honghe                     | 83                    | 63                          |          |          |
| Kunming                    | 79                    | 60                          |          |          |
| Lijiang                    | 17                    | 15                          |          |          |
| lincang                    | 28                    | 19                          |          |          |
| Nujiang                    | 3                     | 3                           |          |          |
| Puer                       | 32                    | 27                          |          |          |
| Qujing                     | 39                    | 30                          |          |          |
| Wenshan                    | 64                    | 58                          |          |          |
| Xishuangbanna              | 13                    | 3                           |          |          |
| Yuxi                       | 29                    | 25                          |          |          |
| Zhaotong                   | 52                    | 45                          |          |          |
| <b>Gender</b>              |                       |                             | 0.114    | 0.746    |
| Male                       | 357                   | 272                         |          |          |
| Female                     | 229                   | 167                         |          |          |
| <b>Nationality</b>         |                       |                             | 2.287    | 0.154    |
| Chinese                    | 543                   | 417                         |          |          |
| Non-Chinese                | 43                    | 22                          |          |          |
| <b>Age</b>                 |                       |                             | 1.387    | 0.926    |
| ≤20                        | 55                    | 38                          |          |          |
| 21-30                      | 191                   | 136                         |          |          |
| 31-40                      | 132                   | 96                          |          |          |
| 41-50                      | 109                   | 86                          |          |          |
| 51-60                      | 42                    | 32                          |          |          |
| ≥61                        | 57                    | 51                          |          |          |
| <b>Race/ethnicity</b>      |                       |                             | 6.053    | 0.419    |
| Han                        | 345                   | 272                         |          |          |
| Yi                         | 48                    | 34                          |          |          |
| Dai                        | 41                    | 18                          |          |          |
| Hani                       | 30                    | 23                          |          |          |
| Jingpo                     | 23                    | 12                          |          |          |
| Zhuang                     | 21                    | 21                          |          |          |
| Others                     | 78                    | 59                          |          |          |
| <b>Marital Status</b>      |                       |                             | 0.321    | 0.851    |
| Unmarried                  | 198                   | 148                         |          |          |
| Married                    | 264                   | 192                         |          |          |
| Divorced/Widowed           | 124                   | 99                          |          |          |
| <b>Infection Routes</b>    |                       |                             | 2.517    | 0.286    |
| Heterosexual contact       | 462                   | 354                         |          |          |
| Homosexual contact         | 59                    | 49                          |          |          |
| Intravenous drug injection | 65                    | 36                          |          |          |
