# Supplementary material for: Spatial clusters of HIV-1 genotypes in a recently infected population in Yunnan, China
Source: PubMed Central journal article supplement (PMC6664787; doi:10.1186/s12879-019-4276-9), 2019-07-29
Supplement: 12879_2019_4276_MOESM6_ESM.pdf [file 12879_2019_4276_MOESM6_ESM.pdf]

**Additional file 6: Table S3. The proportion of CRF08\_BC in men and women with different transmission routes.**

|       | Contact history            | Total CRF08_BC | The proportion of CRF08_BC | <i>p</i> | OR (95% CI) |                     |
|-------|----------------------------|----------------|----------------------------|----------|-------------|---------------------|
| Men   | Heterosexual contact       | 194            | 89                         | 45.9%    | -           | 1.000               |
|       | Homosexual contact         | 49             | 3                          | 6.1%     | <0.001      | 0.077 (0.023~0.256) |
|       | Intravenous drug injection | 29             | 11                         | 37.9%    | 0.424       | 0.721 (0.323~1.607) |
| Women | Heterosexual contact       | 160            | 93                         | 58.1%    | 0.022       | 1.638 (1.073~2.498) |
|       | Intravenous drug injection | 7              | 3                          | 42.9%    | 0.875       | 0.885 (0.193~4.059) |
