# Supplementary material for: Spatial clusters of HIV-1 genotypes in a recently infected population in Yunnan, China
Source: PubMed Central journal article supplement (PMC6664787; doi:10.1186/s12879-019-4276-9), 2019-07-29
Supplement: 12879_2019_4276_MOESM7_ESM.pdf [file 12879_2019_4276_MOESM7_ESM.pdf]

**Additional file 7: Table S4. The distribution of recent HIV infections was attributed to the main transmission routes in each prefectures.**

| Prefecture    | Heterosexual<br>contact | Homosexual<br>contact | Intravenous drug<br>injection |
|---------------|-------------------------|-----------------------|-------------------------------|
| Baoshan       | 20                      | 3                     | 4                             |
| Chuxiong      | 9                       | 0                     | 0                             |
| Dali          | 24                      | 11                    | 2                             |
| Dehong        | 39                      | 2                     | 30                            |
| Diqing        | 3                       | 0                     | 0                             |
| Honghe        | 78                      | 3                     | 2                             |
| Kunming       | 44                      | 24                    | 11                            |
| Lijiang       | 14                      | 1                     | 2                             |
| lincang       | 24                      | 1                     | 3                             |
| Nujiang       | 3                       | 0                     | 0                             |
| Puer          | 30                      | 1                     | 1                             |
| Qujing        | 36                      | 2                     | 1                             |
| Wenshan       | 60                      | 4                     | 0                             |
| Xishuangbanna | 10                      | 2                     | 1                             |
| Yuxi          | 20                      | 4                     | 5                             |
| Zhaotong      | 48                      | 1                     | 3                             |
| <b>Total</b>  | <b>462</b>              | <b>59</b>             | <b>65</b>                     |
